# Supplementary material
Source: PubMed Central journal article supplement (PMC8715541)
Supplement: NIHMS985504-supplement-Phillips_2018_Supplementary_Material.pdf [file NIHMS985504-supplement-Phillips_2018_Supplementary_Material.pdf]

**Phillips et al.**

Supplementary Table 1: List of CFTR mutations tested

| <i>CFTR mutation</i> | <i>CF</i> | <i>Panc.</i> |
|----------------------|-----------|--------------|
| F508del              | CF        | X            |
| G542X                | CF        | X            |
| G551D                | CF        |              |
| N1303K               | CF        | X            |
| W1282X               | CF        |              |
| R117H*               | CF        | X            |
| R553X                | CF        |              |
| 1717-1G>A            | CF        |              |
| 621+1G>T             | CF        | X            |
| 2789+5G>A            | CF mild   |              |
| 3849+10kbC>T         | CF mild   |              |
| R1162X               | CF        |              |
| G85E                 | CF        |              |
| 3120+1G>A            | CF        |              |
| I507del              | CF        |              |
| 1898+1G>A            | CF        |              |
| 3659delC             | CF        |              |
| R347P                | CF mild   |              |
| R560T                | CF        |              |
| R334W                | CF mild   |              |
| A455E                | CF        |              |
| 2184delA             | CF        |              |
| 711+1G>T             | CF        |              |
| IVS8 T5              | CF        |              |
| 125G>C               |           |              |
| 1716G>A              |           |              |
| 2183AA>G             | CF        |              |
| 711+5G>A             | CF        |              |
| D110H                | CF        |              |
| D1152H               |           | X            |
| D1270N               |           | X            |
| D443Y                |           |              |
| D579G                |           |              |
| F1052V               |           |              |
| F1074L               |           |              |
| F508C                |           |              |
| G1069R               |           |              |
| G1244E               | CF        |              |
| G1349D               |           |              |
| G178R                | CF        |              |
| G551S                |           |              |
| S549N                |           |              |
| I148T                |           |              |
| I336K/T              | CF        |              |
| I807M                |           |              |
| L206W                |           |              |
| L1065P               | CF        |              |
| L967S                |           | X            |
| L997F                |           | X            |
| M1V                  | CF        |              |
| M470V                |           |              |
| 5T                   |           |              |
| M952T                |           |              |
| P67L                 | CF        |              |
| Q1463Q               |           |              |
| R1070Q               |           |              |

---

|            |    |   |
|------------|----|---|
| R117C      | CF |   |
| R170H      |    | X |
| R258G      |    |   |
| R297Q      |    |   |
| R31C       |    |   |
| R352Q      | CF |   |
| R668C      |    |   |
| R74Q       |    | X |
| R74W       |    |   |
| R75Q       |    | X |
| S1235R     |    | X |
| S1255P     |    |   |
| X2183AAG   |    |   |
| S977F      |    |   |
| T338I      | CF |   |
| T854T      |    |   |
| V201M      |    |   |
| 1001+11C>T |    |   |
| G576A      |    |   |
| I1027T     |    |   |
| P1290P     |    |   |
| R1162L     |    |   |
| S492F      | CF |   |

---
